# Supplementary material
Source: publisher figshare collection journal article supplement (https://gsajournals.figshare.com/ndownloader/files/27743274)
Supplement: Supplementary file 1 [file 27743274]

| **Table S8.** Summary of annotation. | | |
| --- | --- | --- |
|  | Gene number | Percentage (%) |
| Total | 20,644 | 100.00 |
| No Hits | 1,420 | 6.88 |
| BLAST hits | 19,224 | 93.12 |
| GO | 15,955 | 77.29 |
| KEGG | 11,560 | 56 |
